# Supplementary material
Source: publisher figshare collection journal article supplement (https://tandf.figshare.com/ndownloader/files/17564768)
Supplement: Supplementary file [file 17564768]

## Supplementary data

Patients treated with surgery (limited fasciectomy) at the study center during the study period (November 2012 through June 2013)

|                         |               |
|-------------------------|---------------|
| Treated patients        | 34 (34 hands) |
| Mean age (range), years | 68 (49–84)    |
| Men, n                  | 28 (82%)      |

Reasons for choosing surgery (as stated in patient's electronic records)

|                                                   |    |
|---------------------------------------------------|----|
| Recurrence after previous                         |    |
| Limited fasciectomy                               | 6  |
| Percutaneous needle fasciotomy                    | 4  |
| Collagenase injection                             | 1  |
| Failed percutaneous needle fasciotomy             | 2  |
| Severe proximal interphalangeal joint contracture | 5  |
| Patient's choice                                  | 5  |
| Surgeon's preference (only performs surgery)      | 11 |
